# Supplementary material for: Decisive interactions that determine ferro/antiferromagnetic coupling in {3d–4f} pairs: a case study on dinuclear {V(iv)–Gd(iii)} complexes
Source: Royal Society of Chemistry journal article supplement (doi:10.1039/c2dt32316h), 2012-12-05

## **Electronic Supporting Information**

### **Decisive Interaction Which Determines Ferro/Antiferromagnetic coupling in {3d-4f} pair: A case study on dinuclear {V-Gd} complexes**

**Saurabh Kumar Singh and Gopalan Rajaraman\***

*Department of Chemistry, Indian Institute of Technology Bombay, Powai, Mumbai, 400076,  
India. Fax:(+91)-22-2576-7152. E-mail:[raJaraman@chem.iitb.ac.in](mailto:raJaraman@chem.iitb.ac.in)*

We performed the DFT and CASSCF calculations on the complexes. The energies, spin densities and the  $J$  values are given in the table for the all the complexes **1**, **2** and **3**.

**Table S1.** DFT and CASSCF computed  $J$  values for parent complex 1, 2, 3 ad their model complexes.

| Complex  | $J_{cal}$<br>( $\text{cm}^{-1}$ ) |                 | CASSCF<br>$f^7+d^1$ | $J_{exp}$<br>( $\text{cm}^{-1}$ ) |
|----------|-----------------------------------|-----------------|---------------------|-----------------------------------|
|          | level I                           | level II<br>DKH |                     |                                   |
| <b>1</b> | 2.2                               | -1.1            | 1.08                | 1.5                               |
| <b>2</b> | -0.7                              | -6.27           | 0.63                | -2.6                              |
| Exchange | $J_1$                             | $J_2$           |                     |                                   |
| <b>3</b> | 0.94                              | -0.01           | -                   | 0.46                              |

**Table S2:** DFT computed energies for dinuclear complex 1 and 2 and their model complexes.

| Complexes                                                           | Spin states | Energies       | $J$ ( $\text{cm}^{-1}$ ) | Spin value $\langle S^2 \rangle$ |         |
|---------------------------------------------------------------------|-------------|----------------|--------------------------|----------------------------------|---------|
|                                                                     |             |                |                          | HS                               | BS      |
| <b>Complex-1</b>                                                    | HS          | -3234.602642   | 2.01697                  | 20.023                           | 13.0229 |
|                                                                     | BS          | -3234.602605   |                          |                                  |         |
| <b>Complex-2</b>                                                    | HS          | -3390.6798     | -0.707                   | 20.0268                          | 13.0268 |
|                                                                     | BS          | -3390.679812   |                          |                                  |         |
| <b>Model of Complex 1</b>                                           |             |                |                          |                                  |         |
| <b>1A</b>                                                           | HS          | -3239.161573   | 2.36649                  | 20.0228                          | 13.0227 |
|                                                                     | BS          | -3239.16153    |                          |                                  |         |
| <b>2A Model Complex of Complex 2 with square pyramidal geometry</b> |             |                |                          |                                  |         |
|                                                                     | HS          | -3197.55213587 | -0.062                   | 20.0278                          | 13.0278 |
|                                                                     | BS          | -3197.55213699 |                          |                                  |         |

**Table S3.** DFT computed energies for tetranuclear complex **3**

| Complex          | Spin states | Energies       | Spin value $\langle S^2 \rangle$ |         |
|------------------|-------------|----------------|----------------------------------|---------|
|                  |             |                | $J(\text{cm}^{-1})$              |         |
| <b>Complex-3</b> | HS          | -8320.05306815 |                                  | 72.0439 |
|                  | BS1         | -8320.05303417 | 0.94                             | 44.0439 |
|                  | BS2         | -8320.05306866 | -0.01                            | 8.044   |

**Figure S1.** Pictorial representation of complex 1 and complex 2 with the labelling on all the atoms to follow table S4.

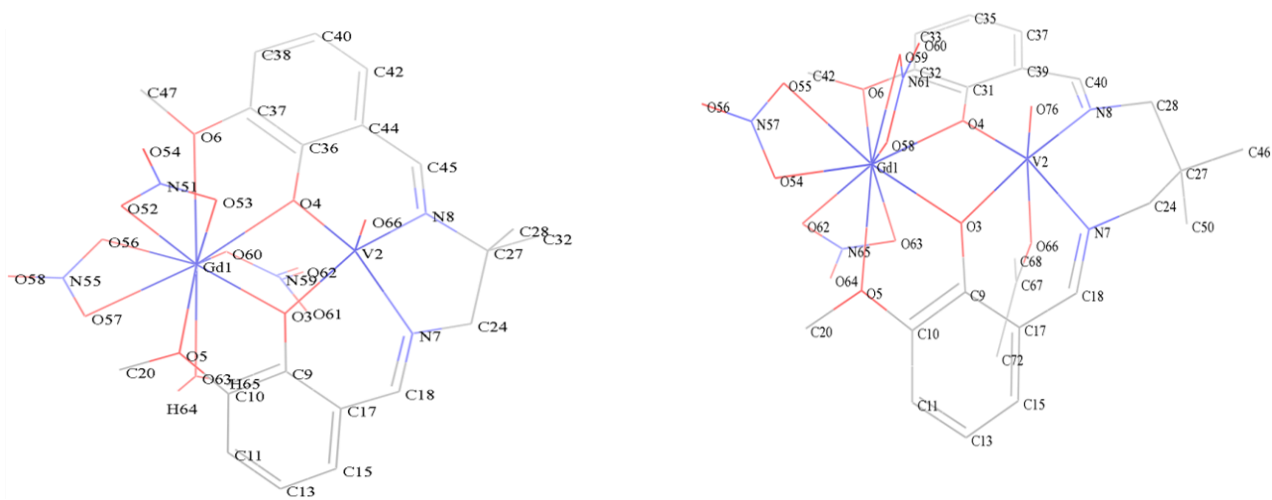

**Table S4.** DFT calculated spin densities on metals as well as their coordinating atoms of **1** and **2**.

| Complex 1 |             | Complex 2 |             |
|-----------|-------------|-----------|-------------|
| 1         | Gd 7.027100 | 1         | Gd 7.029698 |
| 2         | V 1.150492  | 2         | V 1.175478  |
| 3         | O 0.002295  | 3         | O -0.002576 |
| 4         | O -0.001012 | 4         | O -0.002617 |
| 5         | O -0.000772 | 5         | O -0.001076 |
| 6         | O -0.001356 | 6         | O -0.001066 |
| 7         | N -0.015197 | 7         | N -0.027028 |
| 8         | N -0.012296 | 8         | N -0.026958 |
| 51        | N 0.002196  | 54        | O -0.003412 |
| 52        | O -0.005480 | 55        | O -0.003541 |
| 53        | O -0.004272 | 56        | O -0.000272 |
| 54        | O -0.000707 | 57        | N 0.001490  |
| 55        | N 0.001507  | 58        | O -0.004900 |
| 56        | O -0.003771 | 59        | O -0.004828 |
| 57        | O -0.002555 | 60        | O -0.000638 |
| 58        | O -0.000226 | 61        | N 0.001718  |
| 59        | N 0.000613  | 62        | O -0.004225 |
| 61        | O -0.000655 | 63        | O -0.004035 |
| 62        | O -0.000110 | 64        | O -0.000394 |
| 63        | O -0.000748 | 65        | N 0.002386  |
| 64        | H -0.000054 | 66        | O -0.002630 |
| 65        | H 0.000046  | 67        | C 0.000705  |
| 66        | O -0.150471 | 68        | C -0.000141 |
|           |             | 72        | C -0.000239 |
|           |             | 76        | O -0.174317 |

**Figure S2.** The eigenvalues of the seven f- orbitals of complex **1** and **2** computed at CASSCF level of theory.

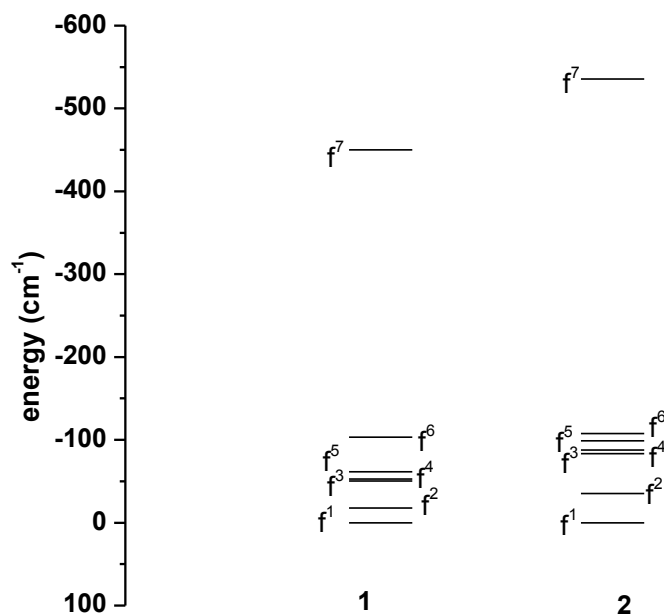

**Table S5:** Calculated overlap integrals for complex **1** and complex **2**

Overlap integrals values are given for complex 1 and 2. The computed overlaps are given in the table as alpha for V(IV) and beta for Gd(III). The Gd-f orbital numbers given are the MO number generated from the DFT calculations

| Complex <b>1</b> $J = 2.2 \text{ cm}^{-1}$ |                 | Complex <b>2</b> $J = -0.7 \text{ cm}^{-1}$ |                 |
|--------------------------------------------|-----------------|---------------------------------------------|-----------------|
| Gd-f orbital                               | V-orbital (176) | Gd-f orbital                                | V-orbital (192) |
| 220                                        | 0.0084          | 241 $f_{xyz}$                               | 0.0118          |
| 221                                        | -0.0062         | 242                                         | 0.0082          |
| 222                                        | -0.0005         | 243                                         | 0.0114          |
| 223 $f_{xyz}$                              | 0.0105          | 246                                         | -0.0020         |
| 224                                        | 0.0014          | 248                                         | 0.0091          |
| 225                                        | 0.0024          | 249                                         | -0.0027         |
| 226                                        | 0.0007          | 245                                         | -0.0014         |

**Figure S3.** square pyramidal model of complex **2**

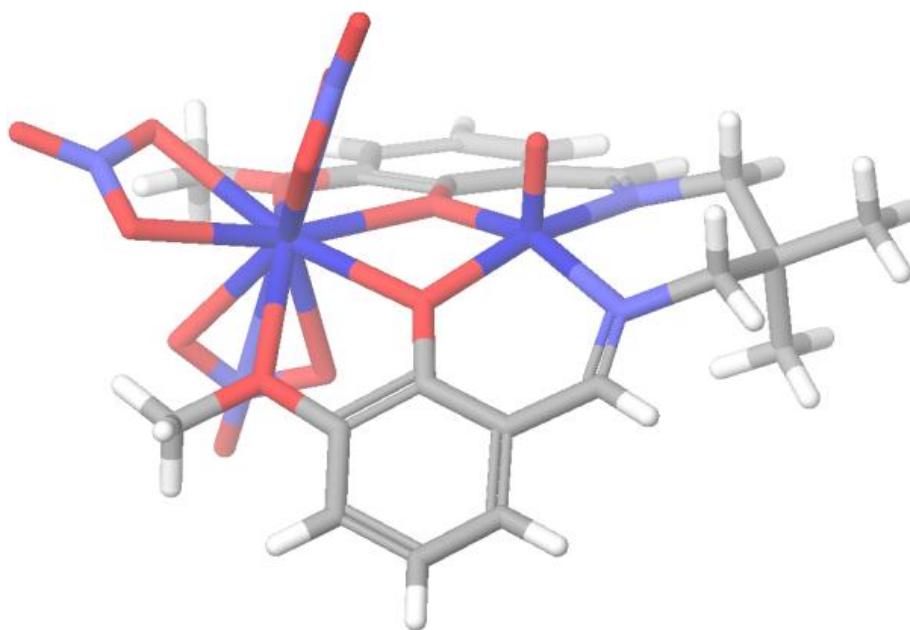

**Complex 2A**

### Fitting

**Bond Distance:** Exponential function  $y=y_0 + A*\exp(R_0*x)$

Where  $y_0=-0.17158$ ,  $A=56707.58781$ ,  $R_0=-4.62901$

**Out of plane shift:** Exponential function  $y = A_2 + (A_1-A_2)/(1 + \exp((x-x_0)/dx))$

where  $A_1= 2.83956$ ,  $A_2=22.32277$ ,  $x_0=2.33158$ ,  $dx=2.56009$

**Dihedral Angle:** Exponential function  $y=y_0 + A*\exp(R_0*x)$

Where  $y_0=3.1014$ ,  $A=-0.5907$   $R_0=-0.05326$

**Bond Angle:** Exponential function  $y=y_0 + A*\exp(R_0*x)$

Where  $y_0= 9.22915$ ,  $A = -3803.58059$   $R_0 = -0.05869$

**Table S6.** Calculated overlap integrals for different bond angles.

| Bond-Angle-99 $J = -2.12 \text{ cm}^{-1}$ |                 | Bond-Angle-103 $J = -0.26 \text{ cm}^{-1}$ |                 | Bond-Angle-112 $J = 4.93 \text{ cm}^{-1}$ |                 |
|-------------------------------------------|-----------------|--------------------------------------------|-----------------|-------------------------------------------|-----------------|
| Gd-f orbital                              | V orbital (180) | Gd-f orbital                               | V-orbital (180) | Gd-f orbital                              | V-orbital (180) |
| 228                                       | -0.0050         | 228                                        | -0.016          | 228                                       | 0.003           |
| 229                                       | 0.0064          | 229                                        | -0.007          | 229                                       | -0.003          |
| 230                                       | -0.0038         | 230                                        | -0.006          | 230                                       | -0.006          |
| 232                                       | 0.0182          | 232                                        | 0.008           | 232                                       | -0.002          |
| 234                                       | 0.0211          | 233                                        | 0.002           | 233                                       | -0.002          |
| 235                                       | -0.0087         | 234 $f_{xyz}$                              | -0.018          | 234 $f_{xyz}$                             | -0.018          |
| 236 $f_{xyz}$                             | -0.0216         | 236                                        | -0.000          | 236                                       | 0.000           |

| Bond-Angle-117 $J = 5.19 \text{ cm}^{-1}$ |                 |
|-------------------------------------------|-----------------|
| Gd-f orbital                              | V-orbital (181) |
| 228                                       | 0.001           |
| 229                                       | 0.012           |
| 230                                       | -0.001          |
| 231                                       | -0.001          |
| 232 $f_{xyz}$                             | 0.005           |
| 233                                       | -0.002          |
| 235                                       | -0.002          |

| Bond-Angle-122 $J = 6.12 \text{ cm}^{-1}$ |                 |
|-------------------------------------------|-----------------|
| Gd-f orbital                              | V-orbital (181) |
| 228                                       | 0.00219         |
| 229                                       | -0.009          |
| 230                                       | -0.005          |
| 232                                       | 0.005           |
| 233 $f_{xyz}$                             | -0.007          |
| 234                                       | 0.006           |
| 235                                       | 0.006           |

**Figure S4.** Thermal variation of  $\chi T$  for complex 3. Same as above but simulation upto 2K.

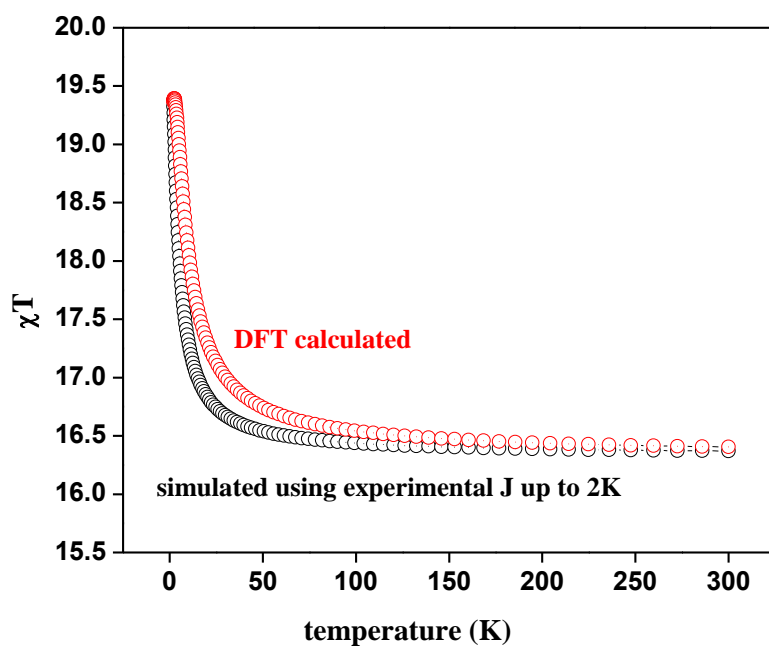

**Figure S5.** Spin density along with labels for the core structure of the tetrameric complex 3.

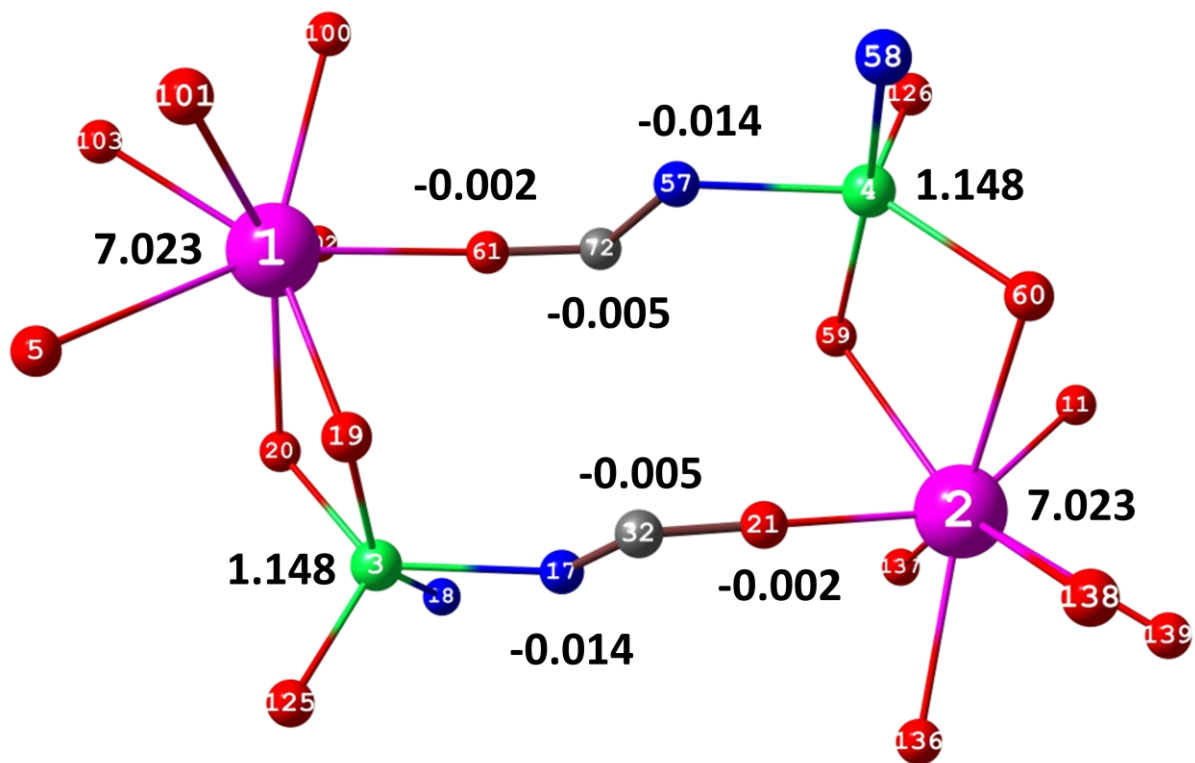

Supplement: c2dt32316h.pdf [file c2dt32316h.pdf]
